# Supplementary material for: Scientific Prospects for Cannabis-Microbiome Research to Ensure Quality and Safety of Products
Source: PubMed Central journal article supplement (PMC7074860; doi:10.3390/microorganisms8020290), 2020-02-20
Supplement: microorganisms-08-00290-s001.pdf [file microorganisms-08-00290-s001.pdf]

Supplement: Table S1. Facts about fungal diseases and molds as potential risk for *Cannabis sativa* product quality and safety for human health

| Host                                                                    | Fungus*                                                                | Risk or Potential Threat**                                                                                                                            | Origin                                                                   |
|-------------------------------------------------------------------------|------------------------------------------------------------------------|-------------------------------------------------------------------------------------------------------------------------------------------------------|--------------------------------------------------------------------------|
| <i>Cannabis sativa</i>                                                  | <i>Achyra aquatica</i>                                                 | Damping off                                                                                                                                           | India                                                                    |
|                                                                         | <i>Achyra</i> sp.                                                      | Damping off                                                                                                                                           | Alabama                                                                  |
|                                                                         | <i>Alternaria alternata</i>                                            | Brown blight, Mold                                                                                                                                    | India                                                                    |
|                                                                         | <i>Alternaria porri</i>                                                | Unknown                                                                                                                                               | France                                                                   |
|                                                                         | <i>Alternaria</i> sp.                                                  | Unknown                                                                                                                                               | Manitoba, Iowa                                                           |
|                                                                         | <i>Alternaria tenuis</i>                                               | Mold                                                                                                                                                  | Kyrgyzstan, Illinois, Kansas                                             |
|                                                                         | <i>Ascochyta bohemieriae</i>                                           | Leaf blight                                                                                                                                           | China                                                                    |
|                                                                         | <i>Ascochyta prasadii</i>                                              | Leaf blight                                                                                                                                           | China                                                                    |
|                                                                         | <i>Ascochyta</i> sp.                                                   | Leaf blight                                                                                                                                           | China                                                                    |
|                                                                         | <i>Aspergillus flavus</i>                                              | Mold, Mycotoxins                                                                                                                                      | Maryland, Virginia, Wisconsin                                            |
|                                                                         | <i>Aspergillus niger</i>                                               | Mold, Mycotoxins                                                                                                                                      | Maryland, Wisconsin                                                      |
|                                                                         | <i>Aspergillus parasiticus</i>                                         | Mold, Mycotoxins                                                                                                                                      | Virginia                                                                 |
|                                                                         | <i>Aspergillus</i> sp.                                                 | Mold, Mycotoxins                                                                                                                                      | Iowa                                                                     |
|                                                                         | <i>Botryosphaeria marconii</i>                                         | Hemp blight                                                                                                                                           | France, Italy, Lithuania, Maryland, Russia, Virginia                     |
|                                                                         | <i>Botrytis cinerea</i>                                                | Gray mold                                                                                                                                             | Bulgaria, California, Canada, Oregon, Virginia                           |
|                                                                         | <i>Botrytis</i> sp.                                                    | Gray mold                                                                                                                                             | Canada, Manitoba                                                         |
|                                                                         | <i>Cephalosporium</i> sp.                                              | Leaf strip, wilt                                                                                                                                      | Iowa                                                                     |
|                                                                         | <i>Cercospora cannabina</i>                                            | Olive leaf spot                                                                                                                                       | Cambodia, China, India, Mississippi, Pakistan, Uganda, Russia, Wisconsin |
|                                                                         | <i>Cercospora cannabina</i>                                            | Olive leaf spot                                                                                                                                       | China, India, Japan, Missouri                                            |
|                                                                         | <i>Cercospora</i> sp.                                                  | Olive leaf spot                                                                                                                                       | Cambodia                                                                 |
|                                                                         | <i>Chaetomium succineum</i>                                            | Unknown                                                                                                                                               | India                                                                    |
|                                                                         | <i>Cladosporium tenuissimum</i>                                        | Stem Canker, Mold                                                                                                                                     | India                                                                    |
|                                                                         | <i>Colletotrichum</i> spp.                                             | Anthraxnose                                                                                                                                           | China                                                                    |
|                                                                         | <i>Coniothyrium</i> sp.                                                | Unknown                                                                                                                                               | Iowa                                                                     |
|                                                                         | <i>Curculium solani</i> - ( <i>Rhizoctonia solani</i> )                | Rot rot, Damping off, Foliar bligh                                                                                                                    | Greece                                                                   |
|                                                                         | <i>Curularia cymbopogonis</i>                                          | Leaf spot, Blight                                                                                                                                     | Nepal                                                                    |
|                                                                         | <i>Cylindrosporium</i> sp.                                             | Blight                                                                                                                                                | Korea, Maryland                                                          |
|                                                                         | <i>Dendrophoma marconii</i> ( <i>Botryosphaeria marconii</i> )         | Twig blight                                                                                                                                           | Chile                                                                    |
|                                                                         | <i>Diaporthe arctii</i> var. <i>achilleae</i>                          | Stem canker                                                                                                                                           | Italy                                                                    |
|                                                                         | <i>Diaporthe quinze</i>                                                | Stem canker                                                                                                                                           | Illinois, United States                                                  |
|                                                                         | <i>Didymella arcuata</i>                                               | Leaf Blight                                                                                                                                           | Germany                                                                  |
|                                                                         | <i>Diplodiella ramentacea</i>                                          | Unknown                                                                                                                                               | Poland                                                                   |
|                                                                         | <i>Epiloccum</i> spp.                                                  | Black dot                                                                                                                                             | India, Iowa                                                              |
|                                                                         | <i>Fusarium avenaceum</i> var. <i>herbarum</i>                         | Stem Canker                                                                                                                                           | Poland                                                                   |
|                                                                         | <i>Fusarium brachyglabosum</i>                                         | Unknown                                                                                                                                               | California                                                               |
|                                                                         | <i>Fusarium equiseti</i>                                               | Bud rot                                                                                                                                               | California                                                               |
|                                                                         | <i>Fusarium radicola</i>                                               | unknown                                                                                                                                               | California, Canada, Poland                                               |
|                                                                         | <i>Fusarium lateritium</i>                                             | Stem canker                                                                                                                                           | Poland                                                                   |
|                                                                         | <i>Fusarium oxysporum</i>                                              | Wilt, Bud rot, Damping off                                                                                                                            | California, Canada, China, Poland                                        |
|                                                                         | <i>Fusarium oxysporum</i> f. sp. <i>cannabis</i>                       | Wilt, Bud rot                                                                                                                                         | California, Illinois                                                     |
|                                                                         | <i>Fusarium solani</i>                                                 | Foot rot, Root rot and Bud rot                                                                                                                        | California, Canada, Poland                                               |
|                                                                         | <i>Fusarium</i> sp.                                                    | Unknown                                                                                                                                               | Canada, Illinois, Indiana, Iowa, Mexico, Russia, Virginia, Wisconsin     |
|                                                                         | <i>Fusarium sulphureum</i>                                             | Damping off, Stem canker                                                                                                                              | Virginia                                                                 |
|                                                                         | <i>Gliomus mossaeae</i>                                                | Root mycorrhiza                                                                                                                                       | Illinois, United States                                                  |
|                                                                         | <i>Golovinomyces cichoracearum</i>                                     | Powdery Mildew                                                                                                                                        | Canada                                                                   |
|                                                                         | <i>Helicium cannabina</i>                                              | Olive leaf spot                                                                                                                                       | Iowa                                                                     |
|                                                                         | <i>Hormodendrum</i> sp.                                                | Mold                                                                                                                                                  | Iowa                                                                     |
|                                                                         | <i>Hymenys cancri</i> - ( <i>Nectria cancri</i> )                      | Foot rot                                                                                                                                              | Maryland                                                                 |
|                                                                         | <i>Leptomyces lacteus</i>                                              | Seed mold                                                                                                                                             | Poland                                                                   |
|                                                                         | <i>Leptosphaeria</i> spp.                                              | Blight                                                                                                                                                | Italy, Romania                                                           |
|                                                                         | <i>Leptosphaerulina trifolii</i>                                       | Leaf and stem spot                                                                                                                                    | India                                                                    |
|                                                                         | <i>Levellia laurica</i>                                                | Powdery mildew                                                                                                                                        | Asia, France, Turkey, Russia                                             |
|                                                                         | <i>Macrophoma</i> sp.                                                  | Stem canker, Wilt                                                                                                                                     | Maryland, Virginia                                                       |
|                                                                         | <i>Macrophoma phaseolina</i>                                           | Charcoal Rot, Damping Off                                                                                                                             | Illinois, Iran, Spain                                                    |
|                                                                         | <i>Micropeltopsis cannabina</i>                                        | Unknown                                                                                                                                               | France                                                                   |
|                                                                         | <i>Monilia</i> sp.                                                     | Brown rot of fruit                                                                                                                                    | Iowa                                                                     |
|                                                                         | <i>Mucor</i> sp.                                                       | Mold                                                                                                                                                  | Wisconsin                                                                |
|                                                                         | <i>Neodysporella cannabina</i> - ( <i>Neodysmella cannabina</i> )      | Stem canker                                                                                                                                           | China                                                                    |
|                                                                         | <i>Myrothecium roridum</i> - ( <i>Paramyrothecium roridum</i> )        | Leaf spot                                                                                                                                             | India                                                                    |
|                                                                         | <i>Oidium</i> sp.                                                      | Powdery mildew                                                                                                                                        | Italy, South Africa                                                      |
|                                                                         | <i>Ophiobolus anguiloides</i>                                          | Stem canker                                                                                                                                           | Minnesota                                                                |
|                                                                         | <i>Oriblia luteola</i>                                                 | Unknown                                                                                                                                               | France                                                                   |
|                                                                         | <i>Popularia sphaerosperma</i> - ( <i>Arthrinium phaeospermum</i> )    | Unknown                                                                                                                                               | India                                                                    |
|                                                                         | <i>Pellicularia rolfsii</i> - ( <i>Athelia rolfsii</i> )               | Southern blight                                                                                                                                       | Korea                                                                    |
|                                                                         | <i>Penicillium capicicola</i>                                          | Bud rot, Mold                                                                                                                                         | Canada                                                                   |
|                                                                         | <i>Penicillium oleanii</i>                                             | Bud rot, Mold                                                                                                                                         | Canada                                                                   |
|                                                                         | <i>Penicillium</i> sp.                                                 | Unknown                                                                                                                                               | Iowa, Wisconsin                                                          |
|                                                                         | <i>Periconia</i> spp.                                                  | Leaf spot                                                                                                                                             | India, Iowa                                                              |
|                                                                         | <i>Peroconopsis cannabina</i> - ( <i>Pseudoperonospora cannabina</i> ) | Downy Mildew                                                                                                                                          | Central Asia, China, Lithuania, Pakistan, Poland, Russia                 |
|                                                                         | <i>Phoma cannabina</i> - ( <i>Neodysmella cannabina</i> )              | Leaf Blight, Stem canker                                                                                                                              | Asia, Europe, United States                                              |
|                                                                         | <i>Phoma herbarum</i>                                                  | Leaf Blight, Stem canker                                                                                                                              | China                                                                    |
|                                                                         | <i>Phoma nebulosa</i> - ( <i>Phomatodes nebulosa</i> )                 | Leaf Blight, Stem canker                                                                                                                              | Netherlands                                                              |
| <i>Phoma</i> sp.                                                        | Leaf Blight, Stem canker                                               | Poland, Iowa                                                                                                                                          |                                                                          |
| <i>Phomopsis cannabina</i>                                              | White leaf spot, Stem canker                                           | India, Illinois                                                                                                                                       |                                                                          |
| <i>Phomopsis</i> sp.                                                    | White leaf spot, Stem canker                                           | Illinois                                                                                                                                              |                                                                          |
| <i>Phyllosticta cannabina</i> - ( <i>Neodysmella cannabina</i> )        | Leaf spot                                                              | Bulgaria, China, India, Wisconsin                                                                                                                     |                                                                          |
| <i>Phyllosticta stramineola</i> - ( <i>Macrophoma stramineola</i> )     | Leaf spot                                                              | China, Korea                                                                                                                                          |                                                                          |
| <i>Phymatotrichum ansivorum</i> - ( <i>Phymatotrichopsis ansivora</i> ) | Root rot                                                               | Arizona, Texas                                                                                                                                        |                                                                          |
| <i>Phymatotrichum</i> sp.                                               | Root rot, Damping off, Foliar bligh                                    | Mexico                                                                                                                                                |                                                                          |
| <i>Phytophthora</i> sp.                                                 | Root rot                                                               | Korea                                                                                                                                                 |                                                                          |
| <i>Pithomyces chartarum</i> - ( <i>Pseudopithomyces chartarum</i> )     | Leaf blight                                                            | India                                                                                                                                                 |                                                                          |
| <i>Pleosphaerulina cannabina</i>                                        | Pepper spot                                                            | Russia                                                                                                                                                |                                                                          |
| <i>Podosphaera macularis</i>                                            | Powdery mildew                                                         | Switzerland                                                                                                                                           |                                                                          |
| <i>Pseudoperonospora cannabina</i>                                      | Olive leaf spot                                                        | China, India, Korea, Poland                                                                                                                           |                                                                          |
| <i>Pseudoperonospora cannabina</i>                                      | Downy mildew                                                           | Austria, Bulgaria, China, Europe, France, Hungary, Japan, Korea, Kyrgyzstan, Latvia, Poland, Portugal, Romania, Russia, Spain, Switzerland            |                                                                          |
| <i>Puccinia cynodontis</i>                                              | Rust                                                                   | China                                                                                                                                                 |                                                                          |
| <i>Pythium ophanodermatum</i>                                           | Root Rot, Damping off                                                  | California, Canada, Indiana, United States                                                                                                            |                                                                          |
| <i>Pythium dissotocum</i>                                               | Damping off                                                            | Canada                                                                                                                                                |                                                                          |
| <i>Pythium myriophyllum</i>                                             | Damping off                                                            | Canada                                                                                                                                                |                                                                          |
| <i>Pythium ultimum</i> - ( <i>Globisporangium ultimum</i> )             | Root Rot, Damping off                                                  | Canada, Indiana                                                                                                                                       |                                                                          |
| <i>Ramularia collo-cygni</i>                                            | Leaf spot                                                              | Austria, Europe                                                                                                                                       |                                                                          |
| <i>Rhizoctonia</i> sp.                                                  | Root Rot                                                               | Netherlands                                                                                                                                           |                                                                          |
| <i>Schiffneria cannabina</i>                                            | Black Mildew                                                           | Nepal                                                                                                                                                 |                                                                          |
| <i>Sclerotinia sclerotiorum</i>                                         | Hemp Canker, White mold                                                | Canada [Manitoba, Prince Edward Island], China, France, Montana                                                                                       |                                                                          |
| <i>Sclerotium bataticola</i> - ( <i>Macrophoma phaseolina</i> )         | Damping off, Charcoal rot, Collar rot, Stem rot, Root rot              | Bulgaria                                                                                                                                              |                                                                          |
| <i>Sclerotium rolfsii</i> - ( <i>Athelia rolfsii</i> )                  | Southern blight, Root and steam rot                                    | Italy, South Carolina, Texas                                                                                                                          |                                                                          |
| <i>Septoria cannabina</i> - ( <i>Septoria neocannabina</i> )            | Yellow leaf spot                                                       | Canada, New York, Romania                                                                                                                             |                                                                          |
| <i>Septoria cannabina</i>                                               | Yellow leaf spot                                                       | Bulgaria, Canada, China - Florida, Illinois, Iowa, India, Korea, Minnesota, Poland, Romania, Russia, South Dakota, Southeastern states, Taiwan, Texas |                                                                          |
| <i>Sphaerotheca macularis</i> - ( <i>Podosphaera macularis</i> )        | Powdery mildew                                                         | Illinois                                                                                                                                              |                                                                          |
| <i>Spicaria</i> sp.                                                     | Unknown                                                                | Iowa                                                                                                                                                  |                                                                          |
| <i>Stemphylium cannabinum</i>                                           | Leaf Spot, Hemp Canker                                                 | Bulgaria                                                                                                                                              |                                                                          |
| <i>Thiosphaerulus cucumeris</i> - ( <i>Rhizoctonia solani</i> )         | Sheath blight, seed and root rot                                       | China                                                                                                                                                 |                                                                          |
| <i>Trichoderma</i> sp.                                                  | Unknown                                                                | Iowa                                                                                                                                                  |                                                                          |
| <i>Trichothecium roseum</i>                                             | Pink rot, Mold                                                         | Iowa, Iowa                                                                                                                                            |                                                                          |
| <i>Uredo kiriegeriana</i>                                               | Rust                                                                   | Germany, Russia (USSR)                                                                                                                                |                                                                          |
| <i>Verticillium albo-atrum</i>                                          | Tracheomyces, Wilt                                                     | China                                                                                                                                                 |                                                                          |

\* Citation: Farr, D.F., & Rossman, A.Y. (2001). National Fungus Collection, ARS, USDA. 305 records retrieved on July 7th, 2019, from <https://nrc.ars-grin.gov/fungaldata.html>.  
 \*\*Source: An updated list of the Common Names of Plant Diseases by John Michael McPartland 2003. Diseases of Hemp. APS Publications (link: <https://www.apsnet.org/publications/commnames/Pages/Hemp.aspx>) using the Web of Science (data retrieved on July 21, 2019)
